# Supplementary material for: Role of MicroRNAs and their Downstream Target Transcription Factors in Zebrafish Thrombopoiesis
Source: Research Square preprint supplement (doi:10.21203/rs.3.rs-2807790/v1), 2023-04-24

## Supplementary Data

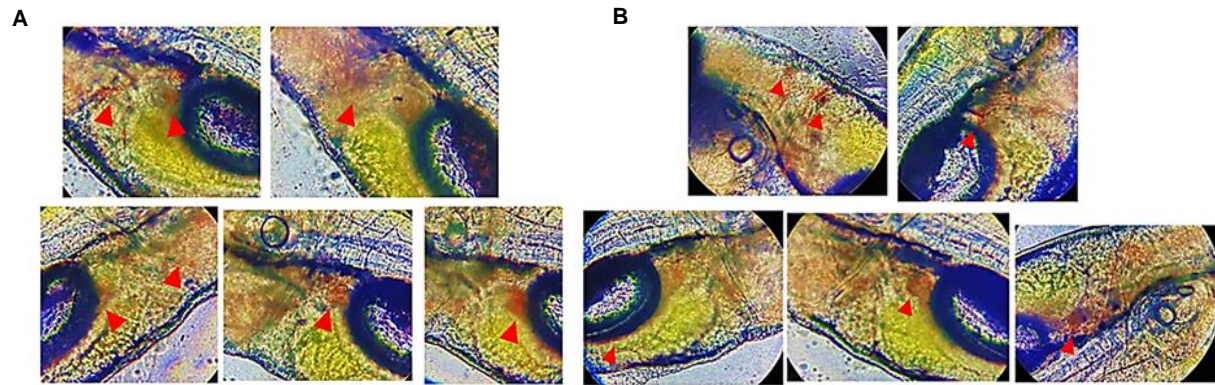

**Figure S1.** Representative images of 5 dpf zebrafish larvae 48 hours post piggyback knockdown of (A) *rorca* and (B) *tgifl*. Arrowhead shows microthrombi at multiple locations.

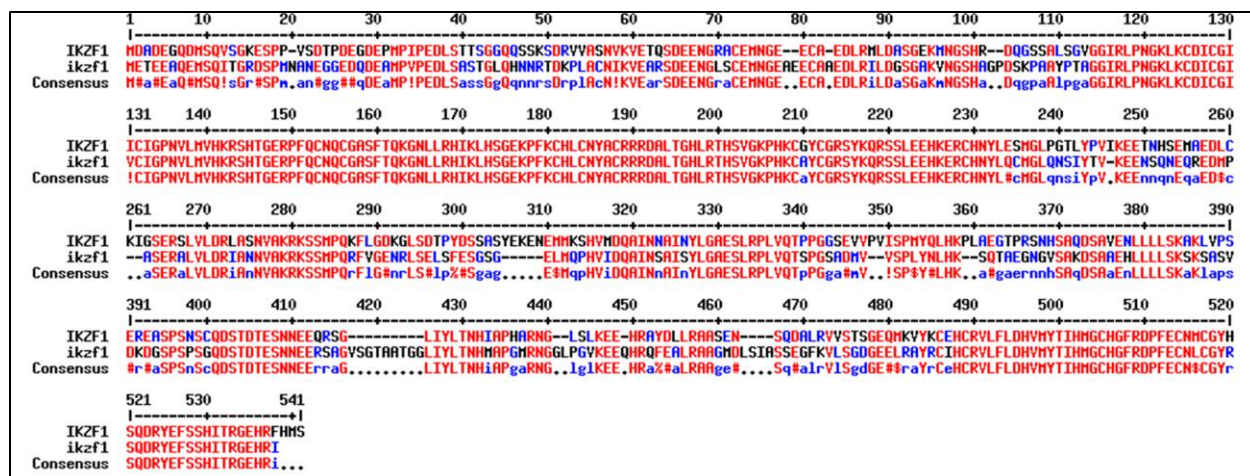

**Figure S2.** MultAlin comparison of the zebrafish *Ikzf1* and human *IKZF1* protein sequences.

The amino acids letters labeled in red, blue and black are high consensus (conserved), low consensus, and neutral, respectively.

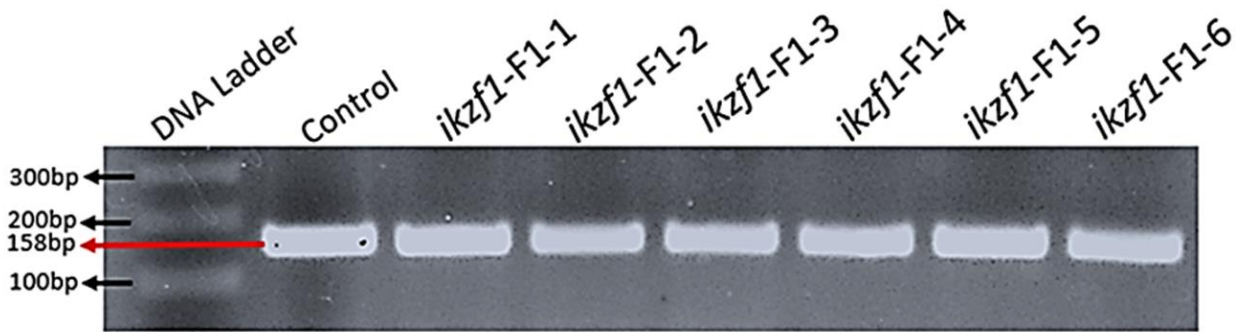

**Figure S3.** Agarose gel electrophoresis showing representative PCR amplified products of genomic DNA from tail clips of the adults grown from *ikzf1* mutant embryos obtained from ZIRC. The original gel is shown below.

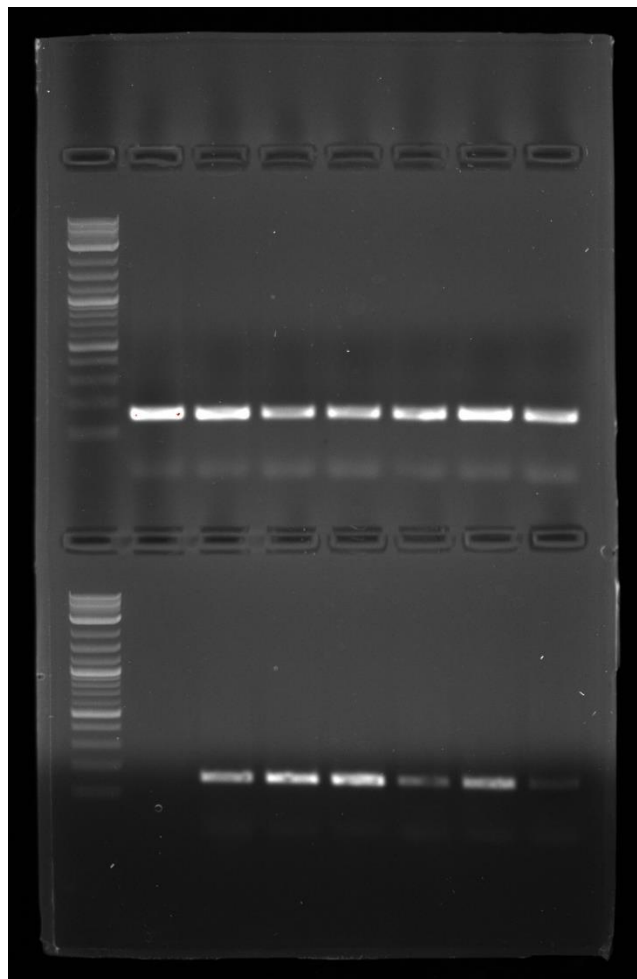

Supplement: Supplementary file 1 [file c25b3b8e19b3fad4b4f4c143.pdf]
